# Supplementary material
Source: publisher figshare collection journal article supplement (https://diabetesjournals.figshare.com/ndownloader/files/29066925)
Supplement: Supplementary file 1 [file 29066925]

## Sheet: Description
Genes differentially expressed between each cell type and all other cells
Columns	Description
pval	p-value from wilcox test comparing the most mature cells based on RNA velocity to all other cells
avg_logFC	average fold change expressed in natural log
pct.1	percent of cells expressing gene (UMI > 0) in cluster
pct.2	percent of cell expressing gene (UMI > 0) in all other clusters
p_val_adj	Bonferroni corrected p-value
cluster	cluster name
gene	gene name

## Sheet: maturation markers
	p_val	avg_logFC	pct.1	pct.2	p_val_adj
DLK1	4.89992e-61	2.20436	1	0.774	9.22999e-57
IAPP	2.40481e-51	2.14614	1	0.964	4.52994e-47
CD99	3.56183e-42	0.612339	1	0.999	6.70942e-38
APOC3	6.39053e-42	-1.11503	0.986	0.993	1.20378e-37
TMOD1	7.2158e-35	0.677336	0.885	0.585	1.35924e-30
APOA1	2.87308e-33	-1.4942	0.986	0.994	5.41203e-29
INS	6.71191e-33	0.607019	1	1	1.26432e-28
HN1	1.36538e-32	0.714806	0.935	0.732	2.57197e-28
MLLT11	7.87154e-32	0.757259	0.942	0.691	1.48276e-27
SERPINA1	8.65306e-31	-1.29444	0.835	0.96	1.62998e-26
RAP1B	2.44679e-27	0.62188	0.871	0.627	4.60902e-23
STMN2	2.65482e-27	0.749761	0.971	0.835	5.00088e-23
MT-ND4	5.90401e-27	-0.429101	1	1	1.11214e-22
SPINK1	3.73189e-26	-1.10449	0.54	0.836	7.02977e-22
LMO1	5.93658e-26	0.598016	0.849	0.586	1.11827e-21
egfp	1.82221e-24	0.718678	0.683	0.34	3.4325e-20
MT-ATP6	1.91683e-24	-0.434827	1	1	3.61073e-20
PCP4	6.63002e-24	0.561845	0.993	0.96	1.2489e-19
FCGRT	1.08991e-23	-0.546375	0.827	0.962	2.05306e-19
AC009014.3	1.62394e-23	-0.608732	0.317	0.729	3.05901e-19
FXYD6	2.1301e-23	0.597864	0.763	0.509	4.01246e-19
PLAC8	7.05743e-22	-0.451613	0.273	0.699	1.32941e-17
NKAIN3	4.5075e-21	0.381685	0.324	0.095	8.49078e-17
NPPC	1.00749e-20	0.646802	0.475	0.189	1.89781e-16
TMSB10	1.2697e-20	0.460684	0.993	0.998	2.39174e-16
GRIA4	2.81566e-20	0.360748	0.734	0.41	5.30386e-16
SLC7A2	3.38759e-20	-0.507696	0.691	0.88	6.3812e-16
MAP1B	6.29821e-20	0.450522	0.935	0.757	1.18639e-15
FTL	1.26821e-19	-0.470561	1	1	2.38893e-15
H3F3A	1.49963e-19	0.264911	1	1	2.82485e-15
IFI6	2.64938e-19	0.456696	1	0.999	4.99063e-15
SMCO4	5.02619e-19	-0.465929	0.59	0.82	9.46783e-15
MT-CO2	9.15974e-19	-0.366381	1	1	1.72542e-14
MT-CO3	1.43124e-18	-0.312176	1	1	2.69603e-14
SMIM24	1.44057e-18	-0.577315	0.302	0.668	2.7136e-14
STMN1	1.63713e-18	0.411886	0.95	0.937	3.08386e-14
KIF5C	2.16152e-18	0.382524	0.863	0.652	4.07165e-14
GOLT1A	7.06071e-18	-0.412024	0.698	0.907	1.33003e-13
CADM1	1.93673e-17	0.397947	0.633	0.371	3.64822e-13
MT-ND2	3.38101e-17	-0.375207	1	1	6.36882e-13
CRH	3.89119e-17	-1.15842	0.345	0.658	7.32983e-13
LHFP	4.79911e-17	0.344092	0.504	0.232	9.04008e-13
CFL1	7.46097e-17	0.290746	1	0.999	1.40542e-12
ERO1B	8.90364e-17	0.348785	0.986	0.917	1.67718e-12
ENTPD3	9.11043e-17	0.29594	0.446	0.189	1.71613e-12
GCG	1.01658e-16	-2.31813	1	1	1.91494e-12
CKB	2.40913e-16	0.407315	0.878	0.748	4.53808e-12
RPIA	2.53768e-16	0.346514	0.64	0.383	4.78023e-12
GAST	3.21622e-16	-1.48546	0.964	0.958	6.0584e-12
PAM	3.93643e-16	0.513669	0.77	0.539	7.41506e-12
APOC1	5.31279e-16	-0.634184	0.856	0.946	1.00077e-11
NR3C1	5.58776e-16	0.409219	0.878	0.752	1.05257e-11
CALB2	8.03114e-16	0.932176	0.835	0.663	1.51283e-11
MT-ND1	8.61587e-16	-0.331737	1	1	1.62297e-11
NEAT1	9.18278e-16	-0.525169	0.813	0.951	1.72976e-11
SPINT2	9.77489e-16	0.32013	1	0.986	1.8413e-11
APOM	1.21534e-15	-0.567625	0.295	0.622	2.28934e-11
HOPX	1.30232e-15	0.465419	0.683	0.444	2.45318e-11
MAP1LC3A	2.3836e-15	0.345514	0.978	0.941	4.48999e-11
GLS	2.47375e-15	-0.364223	0.245	0.591	4.6598e-11
KCNK16	2.80562e-15	0.446833	0.914	0.801	5.28495e-11
DIXDC1	3.70025e-15	0.275478	0.504	0.251	6.97017e-11
PTMA	4.53056e-15	0.326874	1	0.999	8.53422e-11
ASB9	4.65408e-15	0.375877	0.496	0.247	8.76689e-11
TBCB	5.32711e-15	0.382574	0.964	0.945	1.00347e-10
CFC1	1.09395e-14	0.496261	0.626	0.408	2.06068e-10
RRBP1	1.21084e-14	-0.378835	0.439	0.738	2.28086e-10
MME	1.29244e-14	-0.333546	0.137	0.484	2.43457e-10
SEPP1	1.79127e-14	-0.426716	0.482	0.767	3.37422e-10
NEUROD1	2.1284e-14	-0.464839	0.863	0.964	4.00927e-10
NDUFB9	2.16587e-14	0.264778	0.986	0.978	4.07985e-10
TMEM14A	2.59888e-14	-0.418295	0.676	0.868	4.8955e-10
ITIH1	3.55225e-14	-0.509717	0.281	0.59	6.69137e-10
CCBE1	3.68545e-14	0.253136	0.288	0.099	6.94229e-10
FXYD2	3.87432e-14	-0.597212	0.806	0.948	7.29805e-10
BASP1	3.93922e-14	0.397066	0.856	0.672	7.4203e-10
MSRB1	4.6281e-14	-0.339362	0.791	0.934	8.71796e-10
KCTD12	6.37328e-14	-0.331172	0.151	0.49	1.20053e-09
UCP2	6.49553e-14	-0.342374	0.281	0.631	1.22356e-09
GCHFR	7.09376e-14	-0.341015	0.885	0.945	1.33625e-09
MEAF6	9.11067e-14	0.322815	0.856	0.725	1.71618e-09
NDUFA5	1.10468e-13	0.288757	0.95	0.92	2.08088e-09
INSM1	1.17612e-13	-0.410439	0.583	0.778	2.21546e-09
TUBA1A	1.32569e-13	0.68697	0.885	0.793	2.49719e-09
CHMP4B	1.43547e-13	0.305488	0.871	0.745	2.704e-09
ARX	1.45262e-13	-0.341423	0.072	0.379	2.73629e-09
MARCKSL1	1.55696e-13	0.428795	0.942	0.913	2.93284e-09
TFAP2A	1.92546e-13	0.260588	0.187	0.049	3.627e-09
TNFSF10	1.93265e-13	-0.366714	0.108	0.426	3.64054e-09
CD24	2.04934e-13	0.336226	1	0.991	3.86034e-09
MALAT1	2.50002e-13	0.260724	1	1	4.7093e-09
STMN4	2.59343e-13	0.333571	0.259	0.086	4.88524e-09
SMC2	3.12878e-13	-0.375585	0.122	0.457	5.89368e-09
TIMP1	3.17223e-13	0.341914	0.971	0.915	5.97552e-09
CHRNA5	3.18383e-13	0.307813	0.424	0.205	5.99738e-09
PEMT	3.37826e-13	-0.446577	0.698	0.86	6.36363e-09
DCX	3.60482e-13	0.336798	0.619	0.395	6.79041e-09
PCDH7	3.61468e-13	0.323945	0.914	0.717	6.80896e-09
HPCA	3.69895e-13	0.37949	0.748	0.554	6.96771e-09
HLA-B	3.7806e-13	-0.437339	0.755	0.894	7.12152e-09
CCNI	5.52413e-13	0.304449	0.978	0.951	1.04058e-08
GLUL	5.7917e-13	-0.499217	0.604	0.82	1.09098e-08
SLC16A9	7.67895e-13	-0.306154	0.122	0.448	1.44648e-08
MT-CYB	9.68471e-13	-0.286497	1	1	1.82431e-08
EPHX1	1.09187e-12	-0.411232	0.468	0.758	2.05676e-08
STARD3NL	1.10621e-12	0.300336	0.784	0.622	2.08378e-08
PGRMC1	1.11984e-12	0.31367	0.935	0.863	2.10944e-08
NTM	1.38669e-12	0.314837	0.561	0.339	2.6121e-08
DRAIC	1.6381e-12	0.546918	0.504	0.286	3.08569e-08
PDX1	1.67562e-12	0.358365	0.705	0.513	3.15637e-08
RTN1	1.68804e-12	0.58035	0.633	0.447	3.17976e-08
HLA-E	2.3046e-12	-0.360733	0.64	0.848	4.34118e-08
TPD52	2.50397e-12	0.340838	0.928	0.848	4.71672e-08
CRYBA2	3.23895e-12	-0.643208	1	0.999	6.10122e-08
IMPA2	6.94433e-12	-0.331233	0.54	0.771	1.3081e-07
TM4SF5	8.82657e-12	-0.371776	0.115	0.402	1.66266e-07
LDLRAP1	9.53251e-12	-0.327831	0.453	0.712	1.79564e-07
COPE	1.10838e-11	0.293198	0.978	0.93	2.08785e-07
DPP4	1.20018e-11	-0.432158	0.201	0.504	2.26078e-07
AGT	1.21347e-11	-0.49417	0.863	0.955	2.28581e-07
ELAVL2	1.26648e-11	0.276326	0.525	0.303	2.38566e-07
RPN2	1.3847e-11	1.0753	0.763	0.648	2.60835e-07
PRSS23	1.73145e-11	0.46986	0.338	0.154	3.26153e-07
VIM	1.89786e-11	-0.38734	0.072	0.354	3.57501e-07
ARRDC4	1.94742e-11	-0.256322	0.108	0.397	3.66836e-07
MAL2	2.43115e-11	-0.531895	0.64	0.84	4.57955e-07
YBX1	3.1655e-11	0.299179	1	0.967	5.96284e-07
TUBB2B	3.35525e-11	0.443952	0.626	0.439	6.32028e-07
CDC42	4.39801e-11	0.283607	0.95	0.888	8.28453e-07
NEFM	5.09411e-11	0.495145	0.77	0.596	9.59577e-07
TAGLN3	5.54143e-11	0.285571	0.417	0.218	1.04384e-06
ADAMTS5	7.35833e-11	-0.32118	0.273	0.568	1.38609e-06
PLPPR5	7.45192e-11	0.322606	0.676	0.503	1.40372e-06
PPIB	8.9659e-11	0.263946	0.986	0.971	1.68891e-06
EDARADD	8.99137e-11	0.29151	0.475	0.283	1.6937e-06
NDUFC2	9.49962e-11	0.282096	0.964	0.953	1.78944e-06
GSTA1	9.52567e-11	-1.0306	0.331	0.563	1.79435e-06
SORD	1.05966e-10	0.370654	0.619	0.456	1.99608e-06
PFN2	1.17722e-10	0.310724	0.957	0.911	2.21752e-06
PERP	1.4413e-10	0.277392	0.928	0.878	2.71498e-06
CYB5A	1.44139e-10	-0.26053	0.597	0.846	2.71515e-06
MT1X	1.61505e-10	-0.459235	0.892	0.95	3.04227e-06
SRP9	1.62741e-10	0.268611	0.978	0.968	3.06556e-06
KCNK17	1.66009e-10	0.325811	0.77	0.593	3.12711e-06
BEX4	1.70207e-10	0.259992	0.957	0.922	3.20619e-06
SERPINF2	1.86981e-10	-0.388122	0.367	0.611	3.52215e-06
ISL1	2.62286e-10	0.306393	0.921	0.864	4.94069e-06
APLP1	2.78799e-10	0.354437	0.799	0.709	5.25174e-06
MPC2	3.6977e-10	-0.263012	0.856	0.956	6.96535e-06
GREM2	3.72745e-10	0.275891	0.367	0.184	7.02139e-06
DCTN3	6.04236e-10	0.254745	0.978	0.886	1.1382e-05
MEG3	6.0817e-10	0.325702	0.223	0.082	1.14561e-05
ACTB	7.06654e-10	0.26875	1	0.999	1.33112e-05
MT-ND5	7.07299e-10	-0.305634	0.993	0.999	1.33234e-05
XBP1	7.36377e-10	0.265783	0.928	0.83	1.38711e-05
RTN4	8.59159e-10	0.267286	0.986	0.943	1.6184e-05
MDK	1.08635e-09	0.277065	1	1	2.04636e-05
SAT1	1.19974e-09	-0.369805	0.914	0.964	2.25994e-05
ALCAM	1.35198e-09	-0.267407	0.424	0.709	2.54672e-05
MT-ND3	1.38382e-09	-0.282705	1	1	2.60669e-05
FAM105A	1.63059e-09	0.301925	0.496	0.312	3.07155e-05
PAFAH1B3	1.76275e-09	0.306884	0.878	0.763	3.3205e-05
PLXNA2	1.89348e-09	0.273946	0.597	0.408	3.56675e-05
CD74	2.08682e-09	-0.355022	0.777	0.883	3.93093e-05
ESPN	2.13738e-09	-0.255738	0.194	0.464	4.02618e-05
CDC42EP3	2.1801e-09	-0.333567	0.439	0.698	4.10665e-05
RGS14	2.20034e-09	-0.254519	0.295	0.558	4.14478e-05
ST6GALNAC5	2.30075e-09	0.277543	0.799	0.64	4.33393e-05
TCEAL7	2.44847e-09	0.404747	0.561	0.4	4.61219e-05
TMEM141	2.45189e-09	-0.264359	0.763	0.913	4.61863e-05
SPATS2L	2.55417e-09	-0.265201	0.662	0.812	4.81129e-05
PTS	2.9765e-09	0.265479	0.755	0.665	5.60684e-05
PAPPA2	3.1159e-09	0.487351	0.266	0.117	5.86942e-05
SPCS2	3.31144e-09	0.277862	0.892	0.805	6.23777e-05
TXN	3.31919e-09	0.350595	0.964	0.937	6.25237e-05
SLC39A5	3.90972e-09	-0.264019	0.281	0.53	7.36474e-05
HLA-C	4.00384e-09	-0.284048	0.532	0.767	7.54204e-05
CHGA	6.01859e-09	-0.453734	1	1	0.000113372
MAFB	6.54926e-09	0.291138	0.95	0.929	0.000123368
SCG3	6.94406e-09	0.322235	0.978	0.958	0.000130805
RP11-788H18.1	8.04773e-09	-0.416604	0.374	0.6	0.000151595
APOA2	8.13925e-09	-1.12208	0.547	0.75	0.000153319
PIPOX	9.00692e-09	0.281289	0.403	0.234	0.000169663
SARAF	9.51795e-09	0.263897	0.971	0.917	0.00017929
DAD1	9.53535e-09	0.251822	0.971	0.922	0.000179617
ID1	1.04375e-08	-0.646238	0.374	0.592	0.000196612
PKM	1.04923e-08	0.390506	0.957	0.913	0.000197644
TMEM59L	1.07748e-08	0.348018	0.748	0.64	0.000202965
DNAJC12	1.09731e-08	0.309309	0.662	0.522	0.0002067
CTSZ	1.10755e-08	-0.378009	0.59	0.762	0.00020863
ASS1	1.18069e-08	-0.252425	0.46	0.699	0.000222407
TUNAR	1.28146e-08	0.288405	0.561	0.399	0.000241389
C8G	2.06075e-08	-0.303629	0.101	0.327	0.000388184
TMEM242	2.11854e-08	0.260561	0.691	0.557	0.000399069
HMGB3	2.68867e-08	-0.330909	0.331	0.581	0.000506465
NBL1	2.74307e-08	-0.456023	0.482	0.672	0.000516712
ARF5	2.74901e-08	0.253962	0.791	0.74	0.00051783
RGS9	3.61427e-08	0.385015	0.525	0.384	0.00068082
MT2A	5.64246e-08	-0.4605	0.885	0.934	0.00106287
LMO2	5.76168e-08	0.307111	0.54	0.387	0.00108533
MLN	9.55808e-08	-0.31457	0.101	0.322	0.00180045
CYP1A1	9.84959e-08	-0.431186	0.187	0.413	0.00185537
MT1E	1.04988e-07	-0.279976	0.727	0.841	0.00197766
TMEM196	1.07349e-07	0.260382	0.561	0.401	0.00202213
ALDH1A1	1.14786e-07	-0.267181	0.504	0.727	0.00216223
ARL4C	1.48686e-07	0.256058	0.489	0.329	0.0028008
GHRH	1.62312e-07	0.940178	0.237	0.11	0.00305747
CHGB	1.81065e-07	-0.308423	0.712	0.844	0.00341072
RP5-1185K9.1	2.31018e-07	0.419828	0.223	0.098	0.00435168
GPX3	3.83623e-07	-0.352376	0.791	0.887	0.00722631
SPTSSB	4.0497e-07	-0.30184	0.41	0.632	0.00762842
TMX4	5.20845e-07	0.30604	0.748	0.64	0.00981116
BAALC	6.62817e-07	0.294499	0.784	0.658	0.0124855
SCG5	6.85633e-07	0.260202	1	1	0.0129153
FXYD3	7.16437e-07	-0.413923	0.446	0.638	0.0134955
ICA1	7.49413e-07	0.27892	0.576	0.44	0.0141167
FEV	8.34403e-07	-0.453881	0.374	0.586	0.0157176
TMSB4X	9.84797e-07	0.675488	0.993	0.979	0.0185506
TPH1	1.27372e-06	-0.489644	0.122	0.313	0.023993
FABP1	1.3636e-06	-0.689958	0.23	0.427	0.0256862
WDR25	1.39305e-06	0.297466	0.439	0.312	0.0262409
FABP5	1.85505e-06	-0.253212	0.41	0.619	0.0349436
RBP1	2.54963e-06	0.281952	0.978	0.94	0.0480273
SERPINI1	4.28589e-06	-0.427387	0.417	0.593	0.0807333
SOX11	4.5395e-06	0.25075	0.324	0.193	0.0855106
C1QL1	5.58165e-06	-0.506608	0.727	0.774	0.105141
TMEM190	7.5994e-06	-0.26551	0.612	0.78	0.14315
CALY	8.44043e-06	-0.295435	0.878	0.922	0.158992
APOB	8.9393e-06	0.421068	0.518	0.402	0.16839
GCH1	9.80997e-06	0.251951	0.698	0.619	0.18479
GAL	1.00024e-05	-0.504631	0.281	0.482	0.188415
NDN	1.19066e-05	0.278574	0.784	0.75	0.224285
NEFL	1.44959e-05	0.380583	0.403	0.269	0.27306
APOE	1.71623e-05	-0.392748	1	0.985	0.323286
TFF3	1.71977e-05	0.28529	0.806	0.727	0.323952
ITM2C	1.97899e-05	0.302327	0.957	0.915	0.372783
MT1G	2.47732e-05	-0.361898	0.827	0.895	0.466653
PCSK1	2.87939e-05	0.255247	0.532	0.414	0.542391
LOXL4	3.09438e-05	0.492364	0.504	0.4	0.582888
BTBD17	3.45136e-05	0.399072	0.691	0.572	0.650132
ID3	3.82214e-05	-0.349227	0.266	0.454	0.719976
TTR	6.69697e-05	-0.596936	1	1	1
IGFBP5	7.28126e-05	0.438993	0.647	0.577	1
SCGN	0.000102931	0.253066	0.993	0.983	1
PLD3	0.000126707	0.298496	0.971	0.971	1
MT1H	0.000188383	-0.435873	0.101	0.246	1
CDKN1C	0.000188439	-0.297745	0.568	0.704	1
CITED2	0.000204974	0.338456	0.439	0.35	1
EGFL7	0.000236355	-0.258179	0.935	0.965	1
DNAJB9	0.00024742	0.258197	0.626	0.592	1
DIO3	0.000259373	0.45869	0.223	0.129	1
CXCL12	0.00049238	0.267876	0.633	0.571	1
HES1	0.000531686	-0.264118	0.079	0.197	1
C12orf75	0.000554638	0.305749	0.942	0.899	1
S100A6	0.000773684	0.262135	0.957	0.967	1
PYY	0.000798822	-0.490649	0.252	0.422	1
DKK3	0.000929004	0.305705	0.446	0.367	1
OVOS2	0.00112435	-0.344398	0.259	0.407	1
RAMP1	0.00296568	0.340641	0.532	0.489	1
SST	0.00383205	-1.48176	1	1	1
SPON2	0.00827579	0.805447	0.101	0.202	1
CDK5RAP1	0.0132365	0.290963	0.345	0.295	1
CXCL14	0.0508096	0.761457	0.122	0.082	1
RBP4	0.0720132	-0.798004	0.597	0.661	1
CALCA	0.112908	0.779306	0.137	0.102	1
